# Supplementary material for: Scalable continuous-flow electroporation platform enabling T cell transfection for cellular therapy manufacturing
Source: PubMed Central journal article supplement (PMC10133335; doi:10.1038/s41598-023-33941-2), 2023-04-26
Supplement: 41598_2023_33941_MOESM1_ESM.pdf [file 41598_2023_33941_MOESM1_ESM.pdf]

**Scalable continuous-flow electroporation platform enabling T cell transfection for cellular therapy manufacturing**

Jacob A. VanderBurgh, Thomas N. Corso, Stephen L. Levy, Harold G. Craighead\*

CyteQuest, Inc, Ithaca, NY

## A Jurkat cells

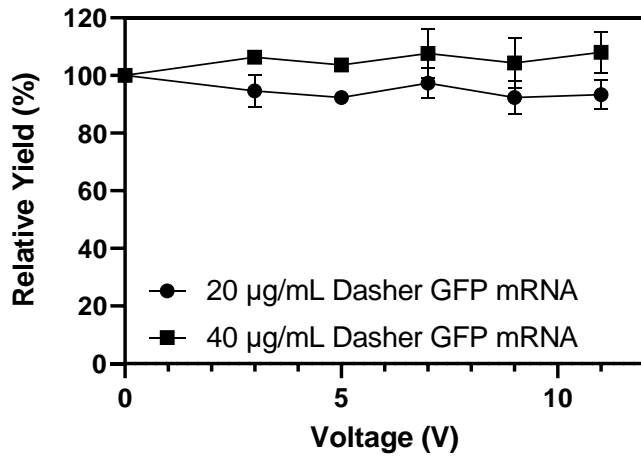

## B Primary Pan T cells

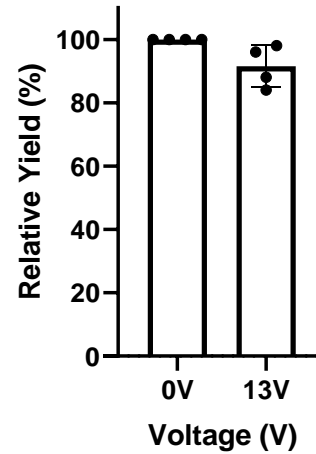

Figure S1: Delivery of mRNA encoding GFP to Jurkat and primary T cells. (A) Impact of varying waveform voltage amplitude on relative yield during delivery of mRNA to Jurkat cells ( $n = 3$ ) or (B) primary T cells from four healthy donors ( $n = 4$ ). Data shown as mean  $\pm$  standard deviation. Some error bars are too small to be visible (A).

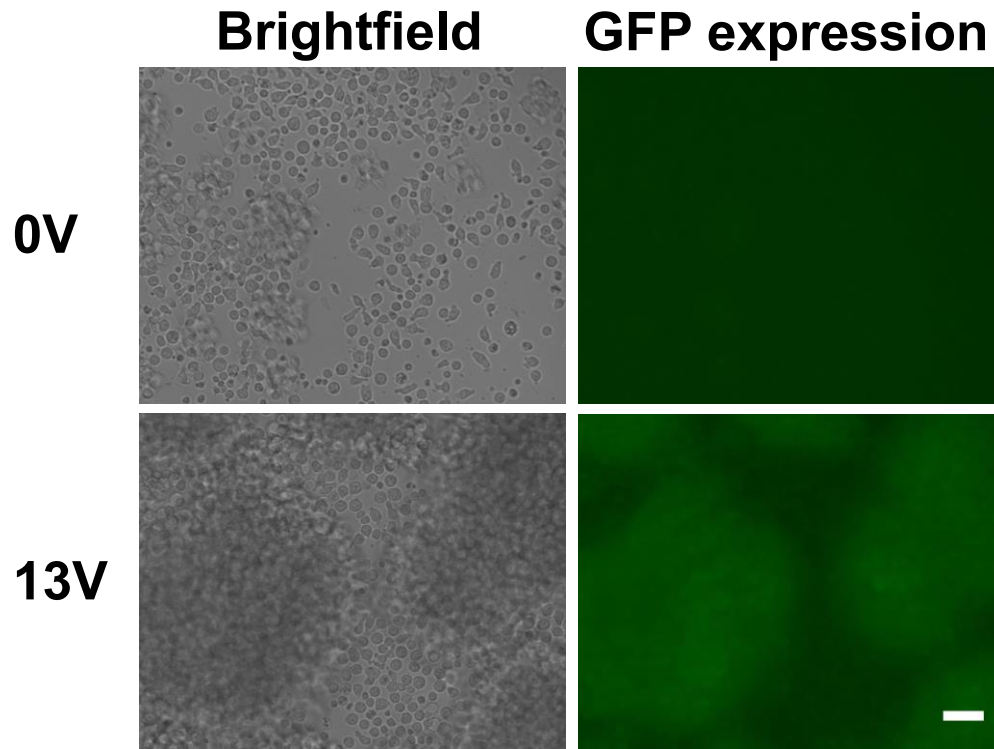

Figure S2: Representative microscopic images from primary T cells 24-h post-transfection with mRNA encoding for GFP (40  $\mu\text{g}/\text{mL}$ ). Waveform: Bipolar rectangular wave with  $f = 100$  Hz,  $V = 13\text{V}$ ,  $t = 100$   $\mu\text{s}$ . Scale bar, 50  $\mu\text{m}$ .

## Gene Pulser: Delivery of mRNA or plasmid DNA encoding GFP

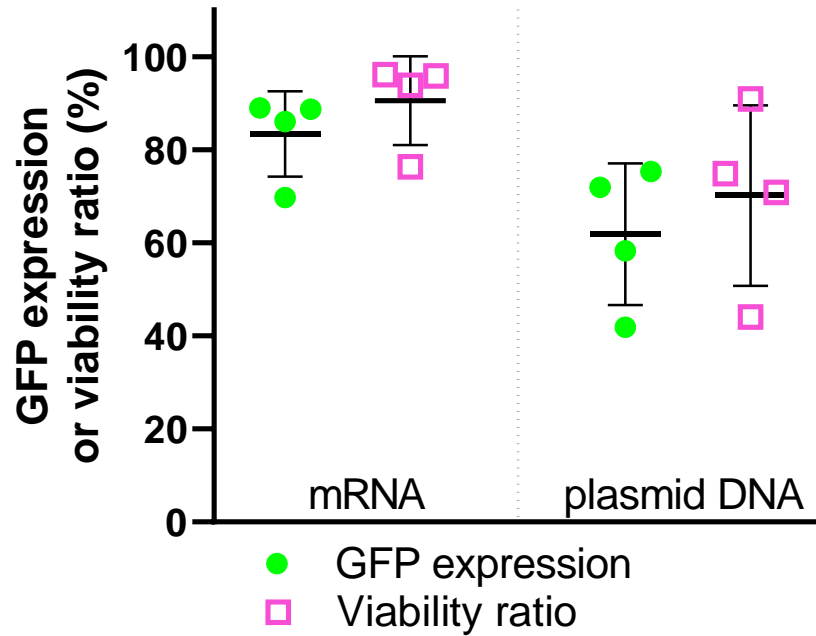

Figure S3: Transfection of primary T cells with mRNA (40  $\mu\text{g}/\text{mL}$ ) or plasmid DNA (75  $\mu\text{g}/\text{mL}$ ) encoding GFP using the Bio-Rad Gene Pulser.  $n = 4$ . Data shown as mean  $\pm$  standard deviation.

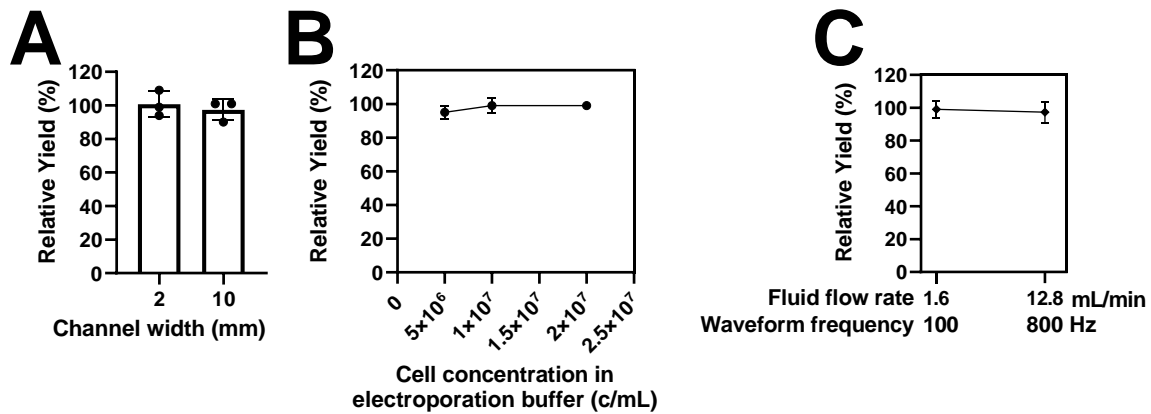

Figure S4: Increasing cell processing throughput for clinical-scale volumes. (A) Plot of relative yield from Jurkat cells transfected with mRNA encoding GFP in either the 2- or 10-mm channels ( $n = 3$ ). (B) Plot of relative yield from Jurkat cells transfected with mRNA encoding GFP in the 2-mm channel at varying cell concentrations ( $n = 3$ ). (C) Plot of relative yield from Jurkat cells transfected with mRNA encoding GFP in the 10-mm channel at varying flow rates and waveform frequencies ( $n = 3$ ). Data shown as mean  $\pm$  standard deviation. Some error bars are too small to be visible (B).

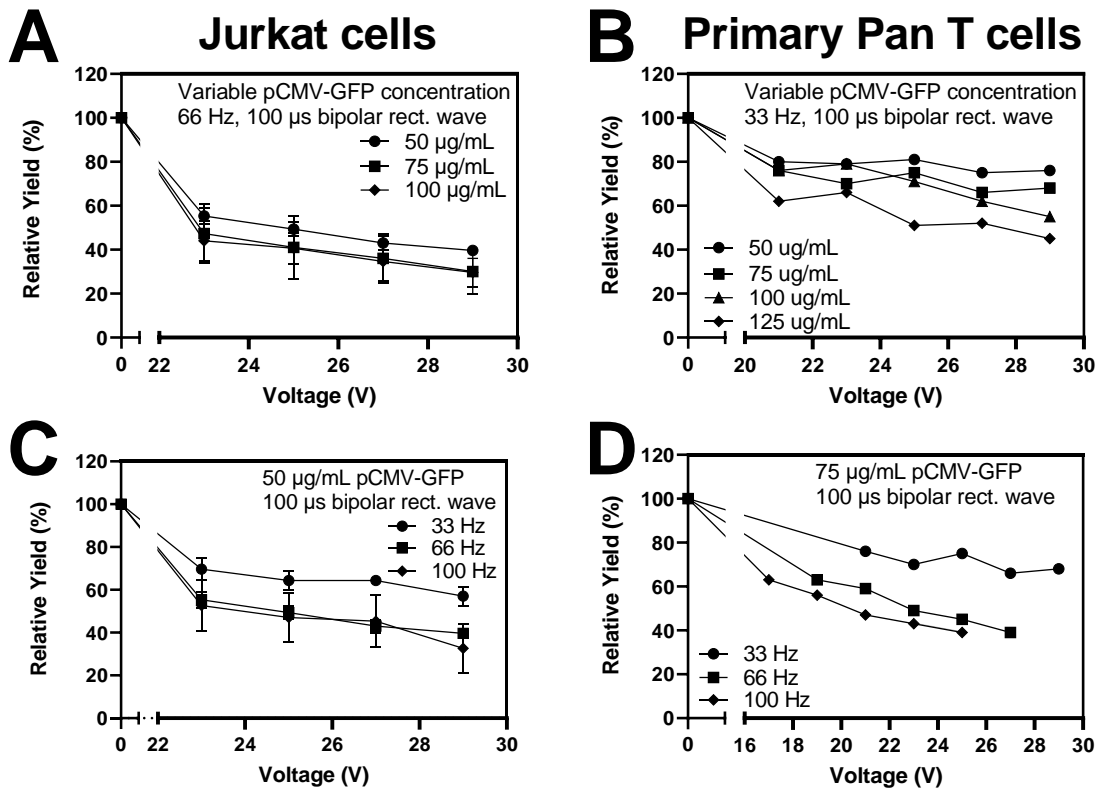

Figure S5: Relative yield data for various transfection parameters for delivering plasmid DNA to Jurkat and primary T cells. (A) Impact of varying plasmid concentration on relative yield for delivering plasmid DNA to Jurkat and (B) primary T cells. (C) Impact of varying waveform frequency on relative yield for delivering plasmid DNA to Jurkat and (D) primary T cells. Data shown as mean  $\pm$  standard deviation;  $n = 3$  (A, C). Data shown as values from a representative donor;  $n = 1$  (B, D).

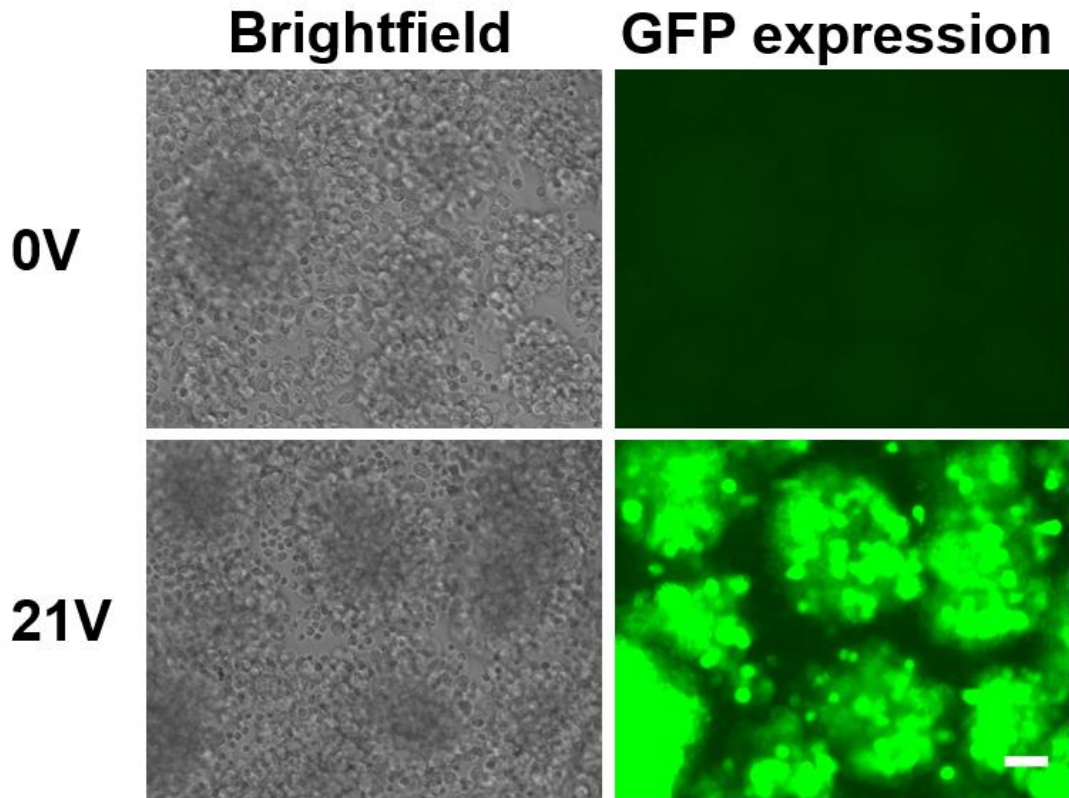

Figure S6: Representative microscopic images from primary T cells 24-h post-transfection with plasmid DNA encoding for GFP (75  $\mu\text{g}/\text{mL}$ ). Waveform: Bipolar rectangular wave with  $f = 66$  Hz,  $V = 21$  V,  $t = 100$   $\mu\text{s}$ . Scale bar, 50  $\mu\text{m}$ .

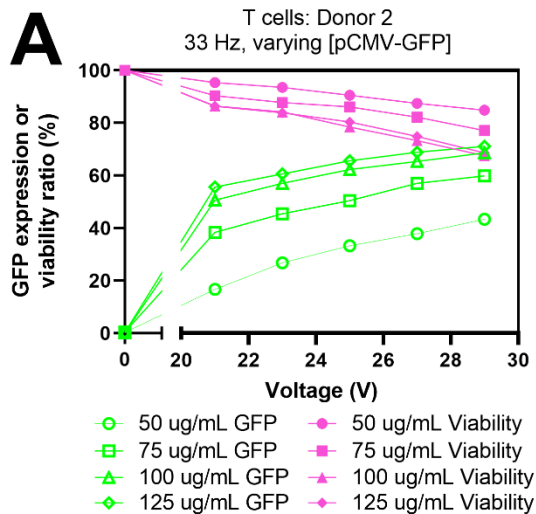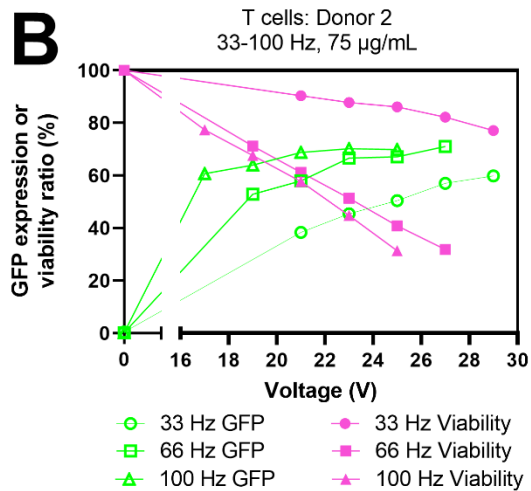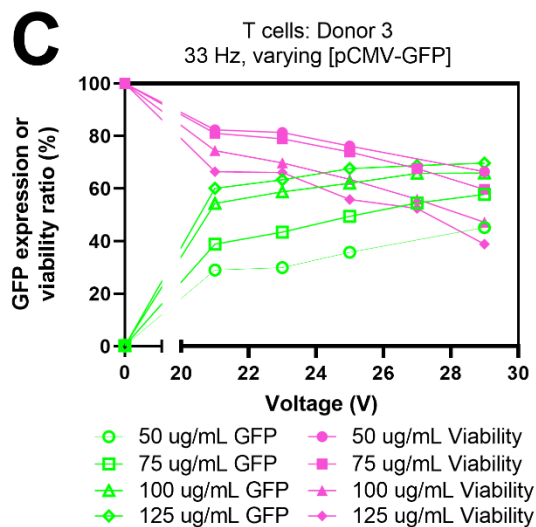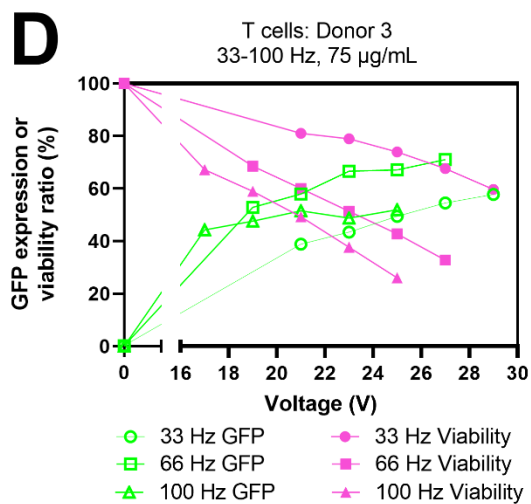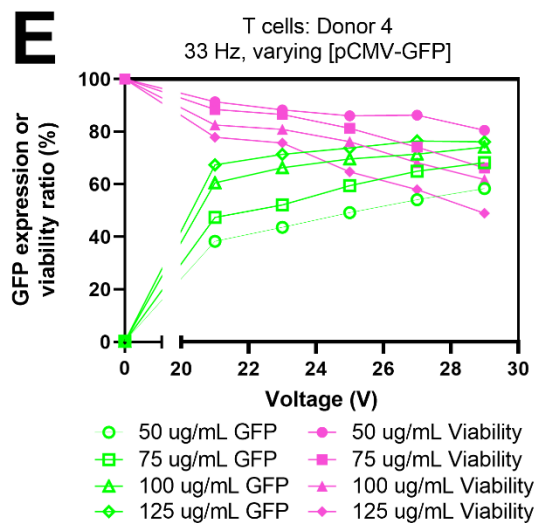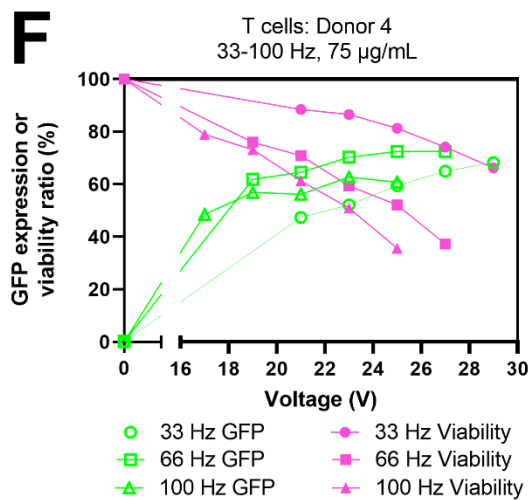



Figure S7: Results for various transfection parameters for delivering plasmid DNA to primary T cells from additional donors. (A) Impact of varying plasmid concentration and (B) waveform frequency for primary T cell donor 2. (C) Impact of varying plasmid concentration and (D) waveform frequency for primary T cell donor 3. (E) Impact of varying plasmid concentration and (F) waveform frequency for primary T cell donor 4.

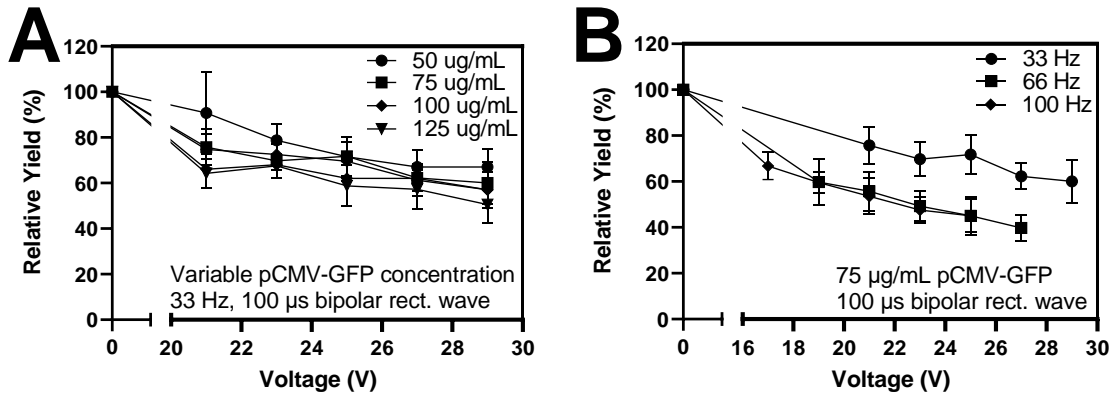

Figure S8: Relative yield data for delivering plasmid DNA primary T cells from four healthy donors. (A) Impact of varying plasmid concentration on relative yield for delivering plasmid DNA to primary T cells. (B) Impact of varying waveform frequency on relative yield for delivering plasmid DNA to primary T cells. Data shown as mean  $\pm$  standard deviation;  $n = 4$ . Data shown here include relative yield data presented in Figure S5B and S5D.

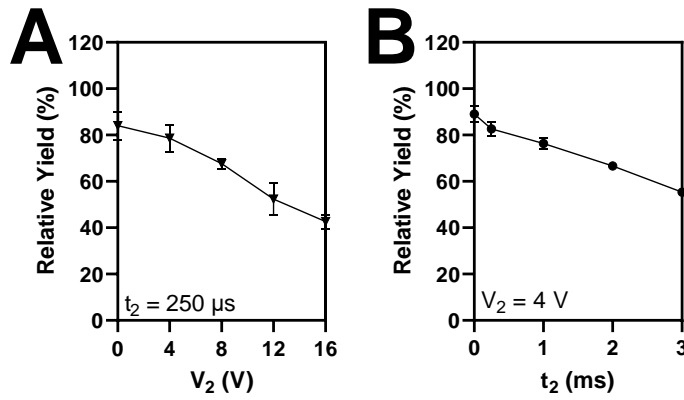

Figure S9: Relative yield data from delivery of an arbitrary electrical waveform to Jurkat cells. (A) Impact of varying  $V_2$  while  $t_2 = 250 \mu\text{s}$  ( $n = 3$ ). (B) Impact of varying  $t_2$  while  $V_2 = 4 \text{ V}$  ( $n = 3$ ). In both (A) and (B), we fix  $f = 66 \text{ Hz}$ ,  $V_1 = 21 \text{ V}$ , and  $t_1 = 75 \mu\text{s}$ . Data shown as mean  $\pm$  standard deviation. Some error bars are too small to be visible.

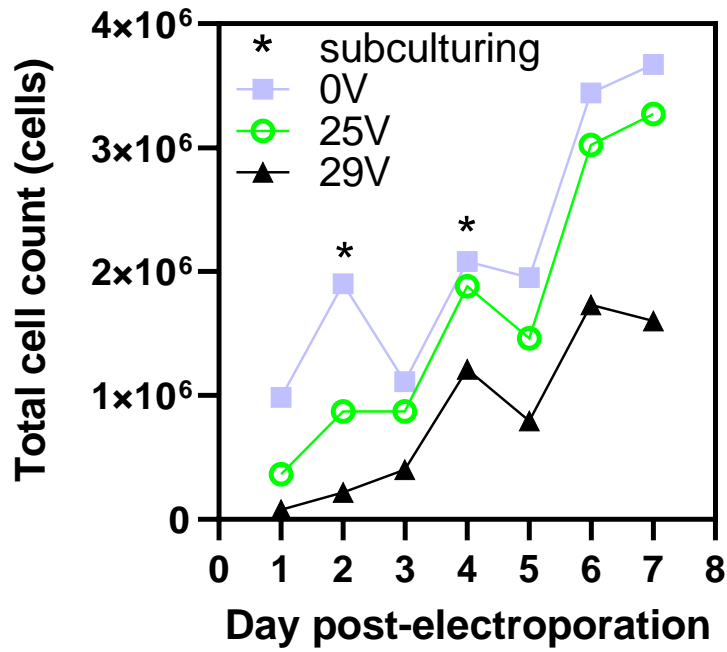

Figure S10: Proliferation of primary T cells transfected with ribonucleoproteins (RNPs) targeting TRAC/TRBC. Plot of total cell count as a function of days post-electroporation from a representative donor ( $n = 1$ ). T cells were subcultured on days 2 and 4 (indicated by \*) using fresh media supplemented with IL-2 (100 IU/mL).
